# Supplementary material for: Highly Thermal Stable Phenolic Resin Based on Double-Decker-Shaped POSS Nanocomposites for Supercapacitors
Source: MDPI journal article supplement (doi:10.3390/polym12092151), 2020-09-21
Supplement: s1 [file s1]

## **Supporting Information**

### **Highly Thermal Stable Phenolic Resin Based on Double-Decker-Shaped POSS Nanocomposites for Supercapacitors**

**Wei-Cheng Chen<sup>1</sup>, Yuan-Tzu Liu<sup>1</sup>, and Shiao-Wei Kuo<sup>1,2\*</sup>**

<sup>1</sup>Department of Materials and Optoelectronic Science, Center of Crystal Research, National Sun Yat-Sen University, Kaohsiung, 80424, Taiwan. chwei566@gmail.com (W.C.C.) and m083100003@student.nsysu.edu.tw (Y.T.L.)

<sup>2</sup>Department of Medicinal and Applied Chemistry, Kaohsiung Medical University, Kaohsiung 807, Taiwan

Correspondence: kuosw@faculty.nsysu.edu.tw (S.-W.K.); Tel.: +886-7-525-4099 (S.-W.K.)

## Characterization

FTIR spectroscopy was performed from 4000 to 400  $\text{cm}^{-1}$  using a Nicolet iS50 FTIR spectrophotometer and the typical KBr pellet method.  $^1\text{H}$ ,  $^{13}\text{C}$  and  $^{29}\text{Si}$  NMR spectroscopy was performed using a Bruker 500 (500 MHz) spectrometer at 25  $^{\circ}\text{C}$ , with  $\text{DMSO-}d_6$  and  $\text{CDCl}_3$  as internal standards. The molecular weights of phenolic/DDSQ hybrids were evaluated from GPC (Waters 510 apparatus) where the molecular weight calibration was used by PS standard. TGA of the phenolic/DDSQ hybrid was performed using a TA Q-50 TGA analyzer; the sample was heated from 40 to 800  $^{\circ}\text{C}$  under a  $\text{N}_2$  atmosphere at a heating rate of 20  $^{\circ}\text{C min}^{-1}$ . Raman spectra were recorded at room temperature using a Jobin-Yvon T6400 micro-Raman apparatus with a He–Cd laser as the excitation source (325 nm). WAXD data of all carbon/DDSQ samples were measured using the BL17A1 wiggler beamline of the National Synchrotron Radiation Research Center (NSRRC), Taiwan, with a wavelength ( $\lambda$ ) of 1.33001  $\text{\AA}$  used from the monochromated beam based on a triangular bent Si (111) single crystal. TEM images of the carbon/DDSQ hybrids were recorded using a JEOL-JEM-2100 microscope operated at 200 kV.

## Electrochemical Measurements

**Working Electrode Cleaning:** Prior to use, the glassy carbon electrode (GCE) was polished several times with 0.05- $\mu\text{m}$  alumina powder, washed with EtOH after each polishing step, cleaned via sonication (5 min) in a water bath, washed with EtOH, and then dried in air.

**Electrochemical Characterization:** The electrochemical experiments were performed in a three-electrode cell using an Autolab potentiostat (PGSTAT204) and 1 M KOH as the aqueous electrolyte. The GCE was used as the working electrode (diameter: 5.61 mm; 0.2475  $\text{cm}^2$ ). A Pt wire was used as the counter electrode; Hg/HgO (RE-61AP, BAS) was used as the reference electrode. Slurries were prepared by dispersing the active material (45 wt. %), carbon black (45 wt. %), and Nafion (10 wt. %)

in EtOH (2 mL) and then sonicating for 1 h. A portion of this slurry (10  $\mu$ L) was pipetted onto the tip of the electrode and dried in air for 30 min prior to use. The electrochemical performance was studied through CV at various sweep rates (from 5 to 200 mV s<sup>-1</sup>) and through the GCD method in the potential range from 0.0 to -1.0 V (vs. Hg/HgO) at various current densities (from 2 to 20 A g<sup>-1</sup>) in 1 M KOH as the aqueous electrolyte solution. The specific capacitances were calculated from the GCD data, using the following equation:

$$C_s = (I\Delta t)/(m\Delta V) \quad (S1)$$

where  $C_s$  (F g<sup>-1</sup>) is specific capacitance of the supercapacitor,  $I$  (A) is the discharge current,  $\Delta V$  (V) is the potential window,  $\Delta t$  (s) is the discharge time, and  $m$  (g) is the mass of the carbon/DDSQ hybrids on the electrode. The energy density ( $E$ , Wh/kg), and the power density ( $P$ , W/kg) were calculated using the following equations:

$$E = 1000 \cdot C(\Delta V)^2 / (2 \cdot 3600) \quad (S2)$$

$$P = E / (t / 3600) \quad (S3)$$

**Table S1.** Comparison between the energy density and power density data /specific capacitance of phenolic/DDSQ hybrids with different materials for supercapacitor application.

| Materials                                    | Specific Capacitance                             | Energy Density<br>Wh/kg | Power Density<br>kW/kg | Ref.         |
|----------------------------------------------|--------------------------------------------------|-------------------------|------------------------|--------------|
| PDDSQ                                        | 689.5 F g <sup>-1</sup> at 0.5A g <sup>-1</sup>  | 121<br>49.5             | 0.68<br>13.60          | This<br>work |
| PDDSQ-50                                     | 258.9 F g <sup>-1</sup> at 0.5A g <sup>-1</sup>  | 26<br>10.5              | 0.68<br>13.60          | This<br>work |
| MnO <sub>2</sub>                             | 65 F g <sup>-1</sup> at 0.25 A g <sup>-1</sup>   | 8                       | 28.00                  | 51           |
| RuO <sub>2</sub> /graphene<br>graphene       | 175 F g <sup>-1</sup> at 0.5 A g <sup>-1</sup>   | 19.7                    | 6.8                    | 52           |
| MnO <sub>2</sub> /CNTs CNTs                  | 12.5 F g <sup>-1</sup> at 0.14 A g <sup>-1</sup> | 42.0<br>28.0            | 0.48<br>19.3           | 53           |
| Porous carbon derived<br>from MOF            | 270 F g <sup>-1</sup> at 2.0 A g <sup>-1</sup>   |                         |                        | 54           |
| Nitrogen-enriched<br>Nanoporous Polytriazine | 656 F g <sup>-1</sup> at 1.0 A g <sup>-1</sup>   | 102                     | 1.6                    | 50           |
| Benzimidazole grafted<br>graphene            | 410 F g <sup>-1</sup> at 0.4 A g <sup>-1</sup>   | -                       | -                      | 55           |
| Nitrogen-doped graphitic<br>carbon           | 255 F g <sup>-1</sup> at 2 A g <sup>-1</sup>     | -                       | -                      | 56           |
| Pyrene-based covalent<br>triazine frameworks | 500 F g <sup>-1</sup> at t 0.5 A g <sup>-1</sup> | -                       | -                      | 57           |
| TPT-DAHQ                                     | 256 F g <sup>-1</sup> at 0.5 A g <sup>-1</sup>   | 43                      | 1.36                   | 58           |
| TaPay-Py COF                                 | 209 F g <sup>-1</sup> at 0.5 A g <sup>-1</sup>   | 11.2                    | 50.1                   | 59           |
| TFP-TPA COF                                  | 291.1 F g <sup>-1</sup> at 2 A g <sup>-1</sup>   | 49.5<br>28.4            | 1.36<br>13.6           | 60           |
| NMCSs                                        | 416 F g <sup>-1</sup> at 0.2 A g <sup>-1</sup>   | 21.5<br>13.3            | 0.8<br>16              | 61           |

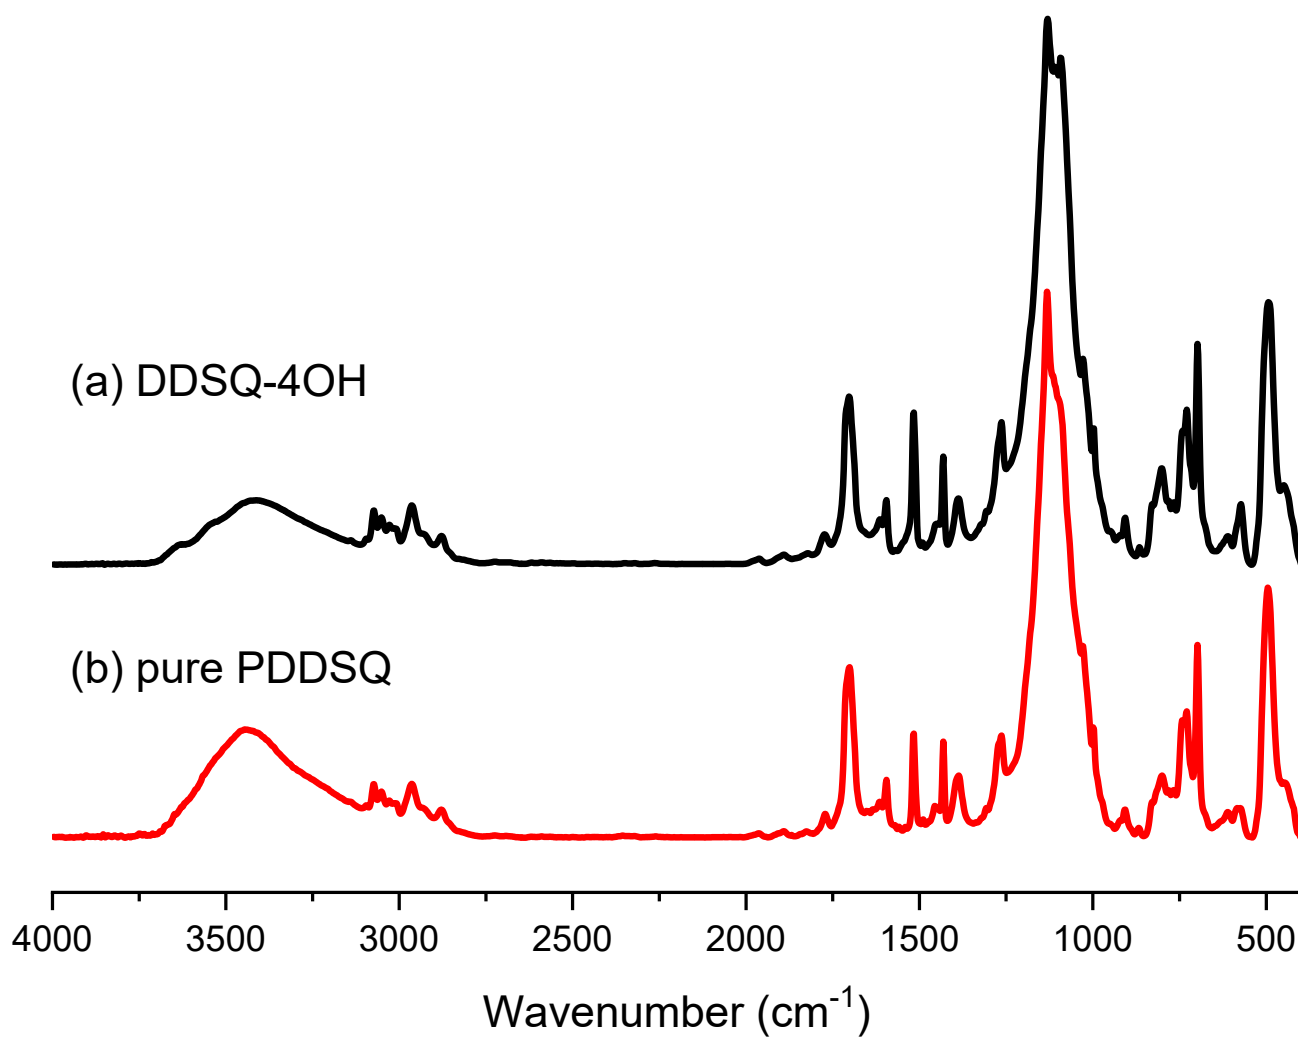

Figure S1. FTIR spectra of (a) DDSQ-4OH and (b) pure PDDSQ.

$M_n = 4500$  g/mol

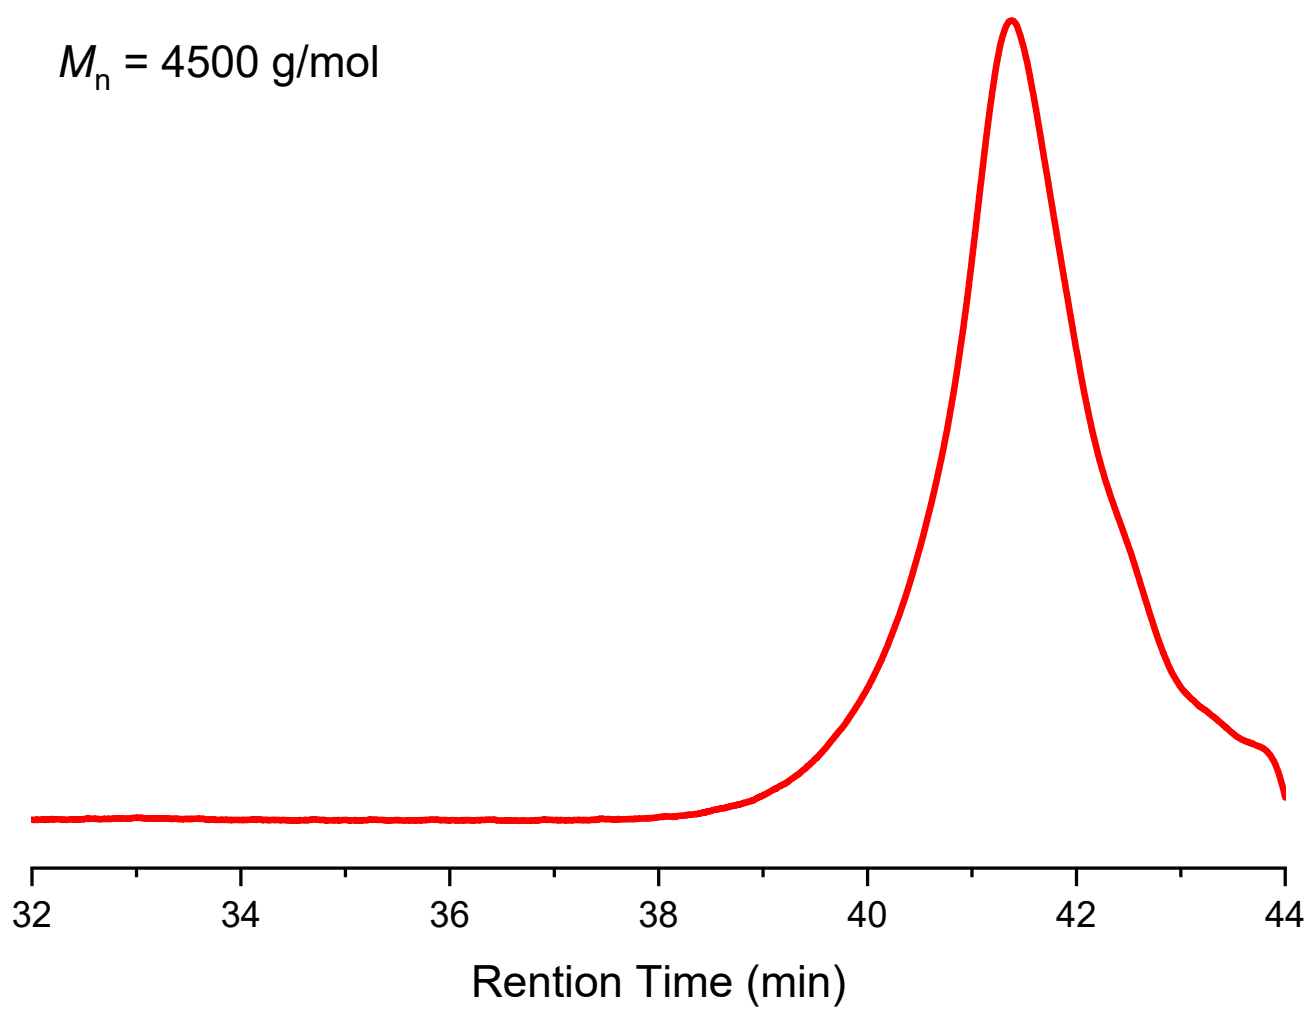

Figure S2: GPC analysis of pure PDDSQ

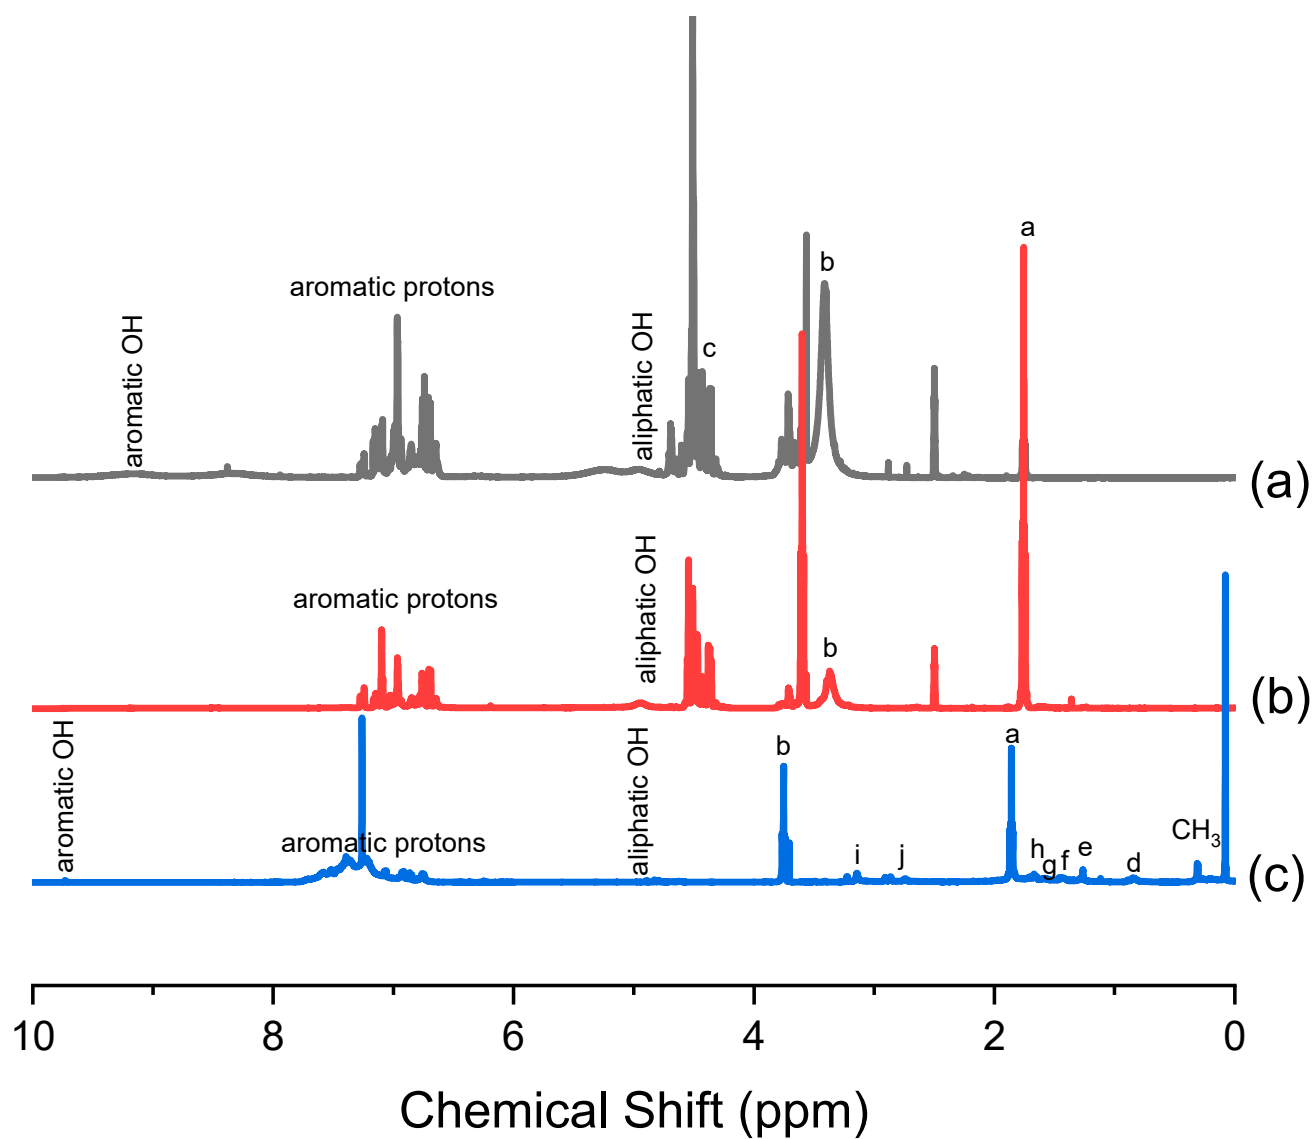

Figure S3:  $^1\text{H}$  NMR spectra of (a) pure phenolic, (b) PDDSQ-50 and (c) pure PDDSQ.

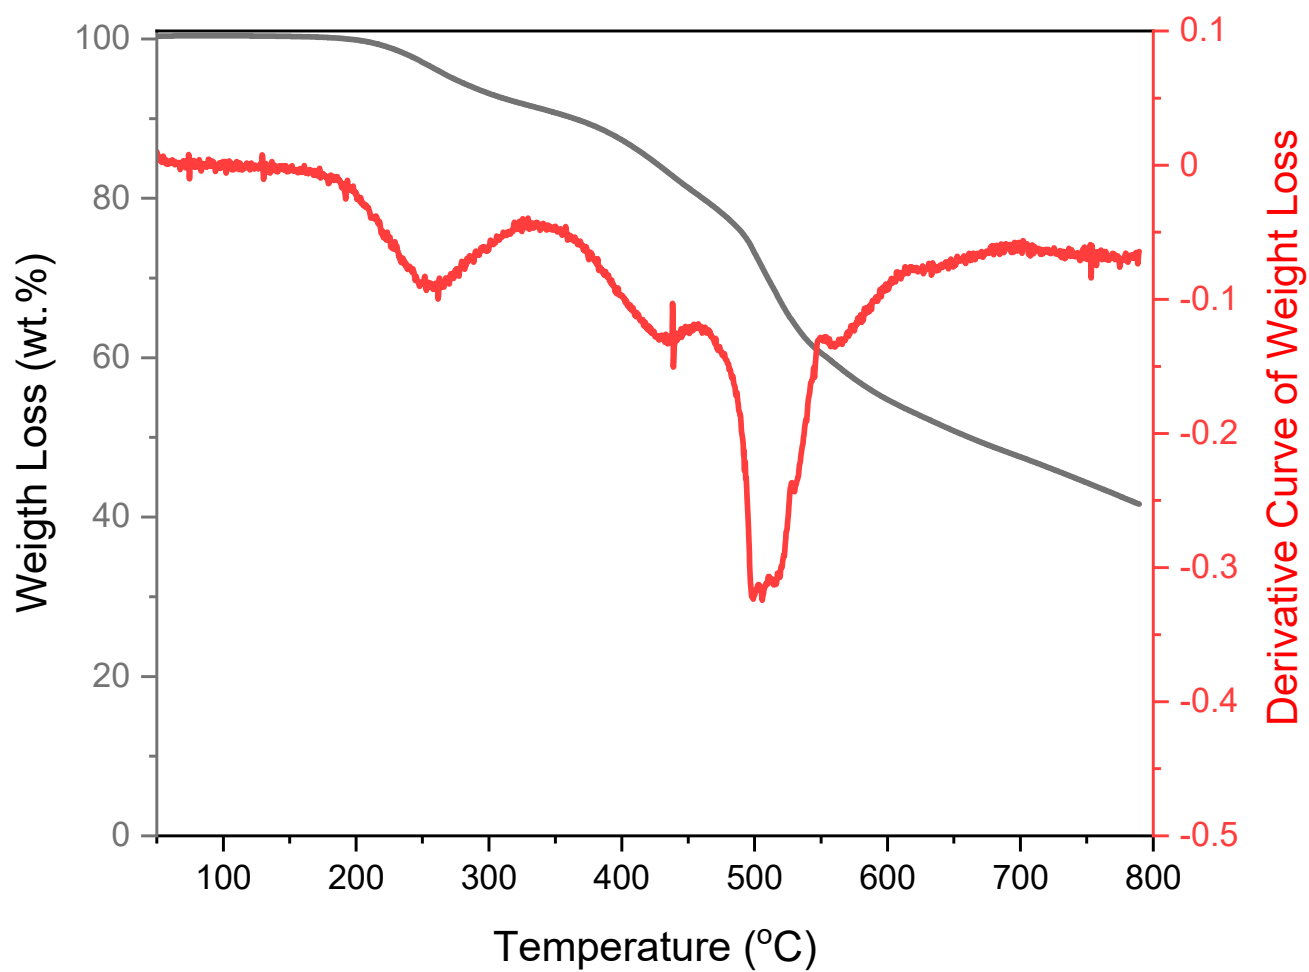

Figure S4: TGA analyses of pure phenolic resin and its corresponding derivative curve.
